# Supplementary material for: Mechanisms of plasma membrane targeting of formin mDia2 through its amino terminal domains
Source: PubMed Central journal article supplement — Mol Biol Cell. 2011 Jan 15;22(2):189–201. doi: 10.1091/mbc.E10-03-0256 (PMC3020915; doi:10.1091/mbc.e10-03-0256), 2011-01-15
Supplement: E10-03-0256_1.pdf [file E10-03-0256_1.pdf]

## Supplemental Figure 2

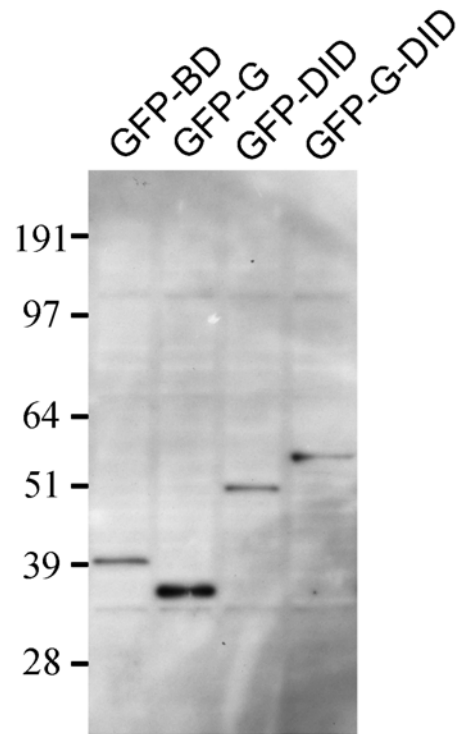

**Supplemental Figure 2.** Cell lysates of HeLa cells expressing indicated GFP-mDia2 fusion proteins are separated by SDS-PAGE and probed with GFP-antibody. No degradation is observed. Molecular weight ladder in kDa is shown to the left of the blot.

## Supplemental Figure 3

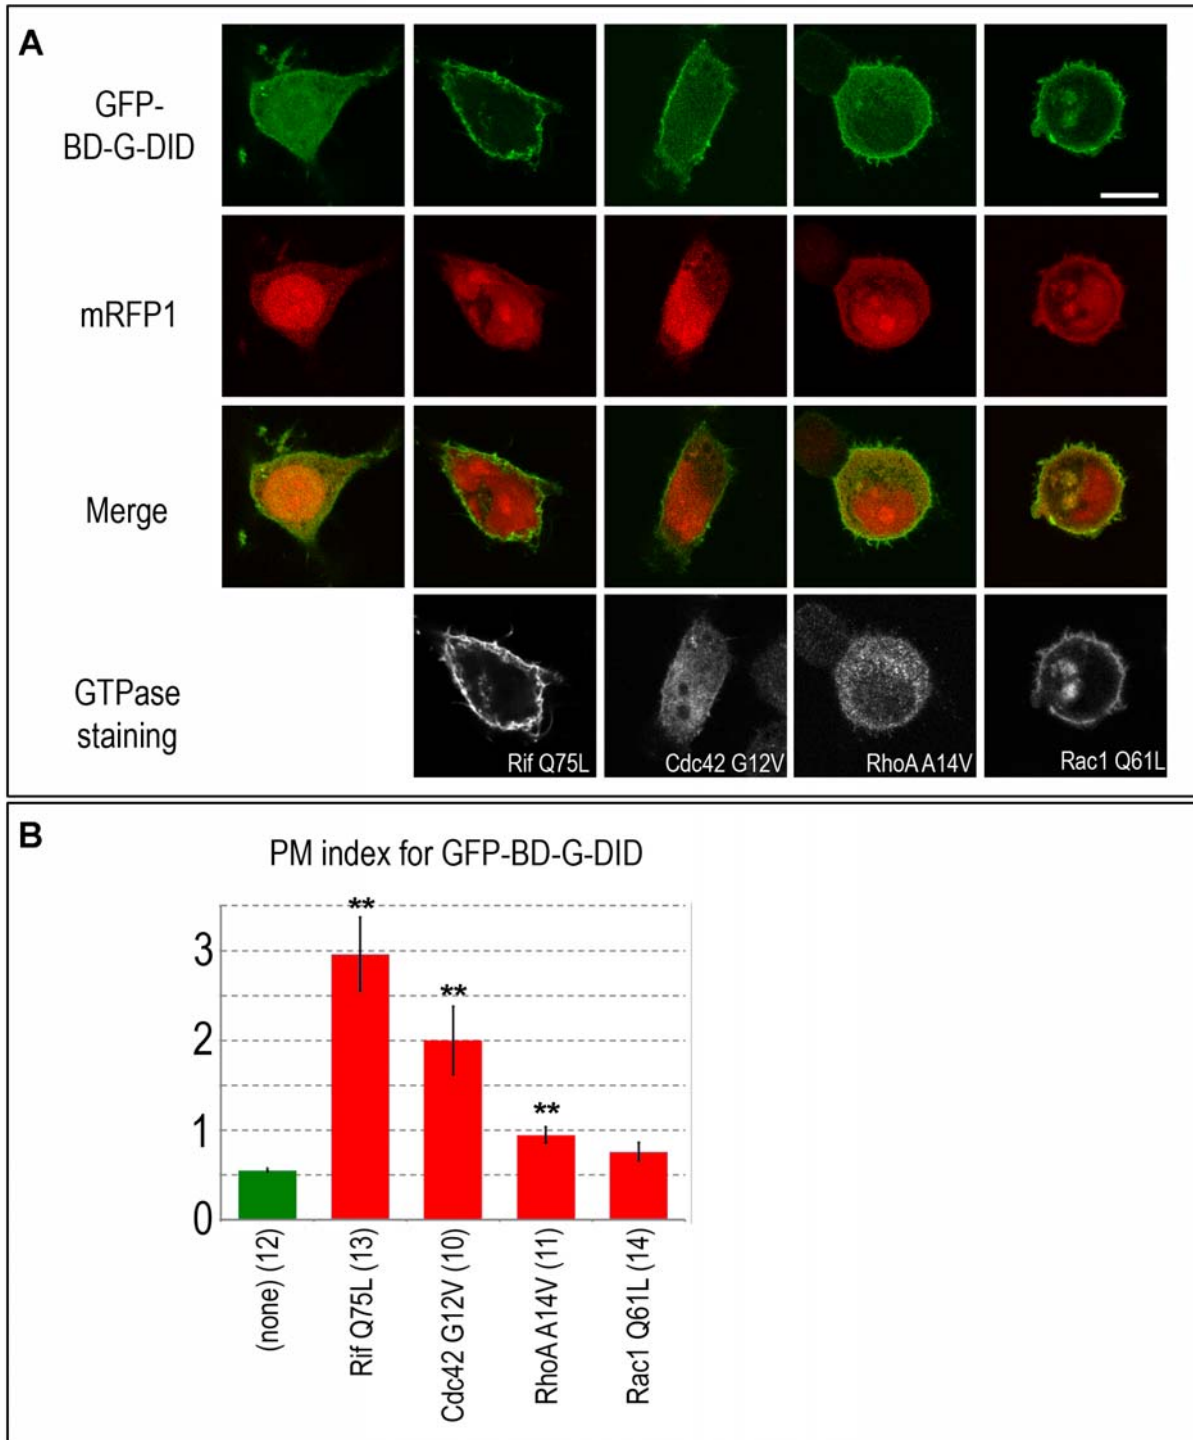

**Supplemental Figure 3.** Effect of indicated constitutively active GTPases on plasma membrane targeting of mDia2 construct GFP-BD-G-DID. Rif causes the greatest increase in PM index (A) Confocal microscopy of HeLa cells co-expressing GFP-BD-G-DID (top row), mRFP1 (second row) and indicated Myc or HA-tagged constitutively active GTPases immunostained with respective tag antibodies (bottom row). Merged GFP-BD-G-DID/mRFP1 images are shown in the third row. Scale bar, 10  $\mu$ m. (B) Quantification of PM index of GFP-BD-G-DID in control HeLa cells (green) and in HeLa cells co-expressing indicated constitutively active GTPases (red). Statistically significant difference with p-value < 0.01 as compared to control cells is marked by two asterisks. P-values in the 0.01-0.05 range are marked with one asterisk.
